# Supplementary material for: When Ribonucleases Come into Play in Pathogens: A Survey of Gram-Positive Bacteria
Source: Hindawi journal article supplement (doi:10.1155/2012/592196), 2012-01-01
Supplement: f1 [file 592196.f1.pdf]

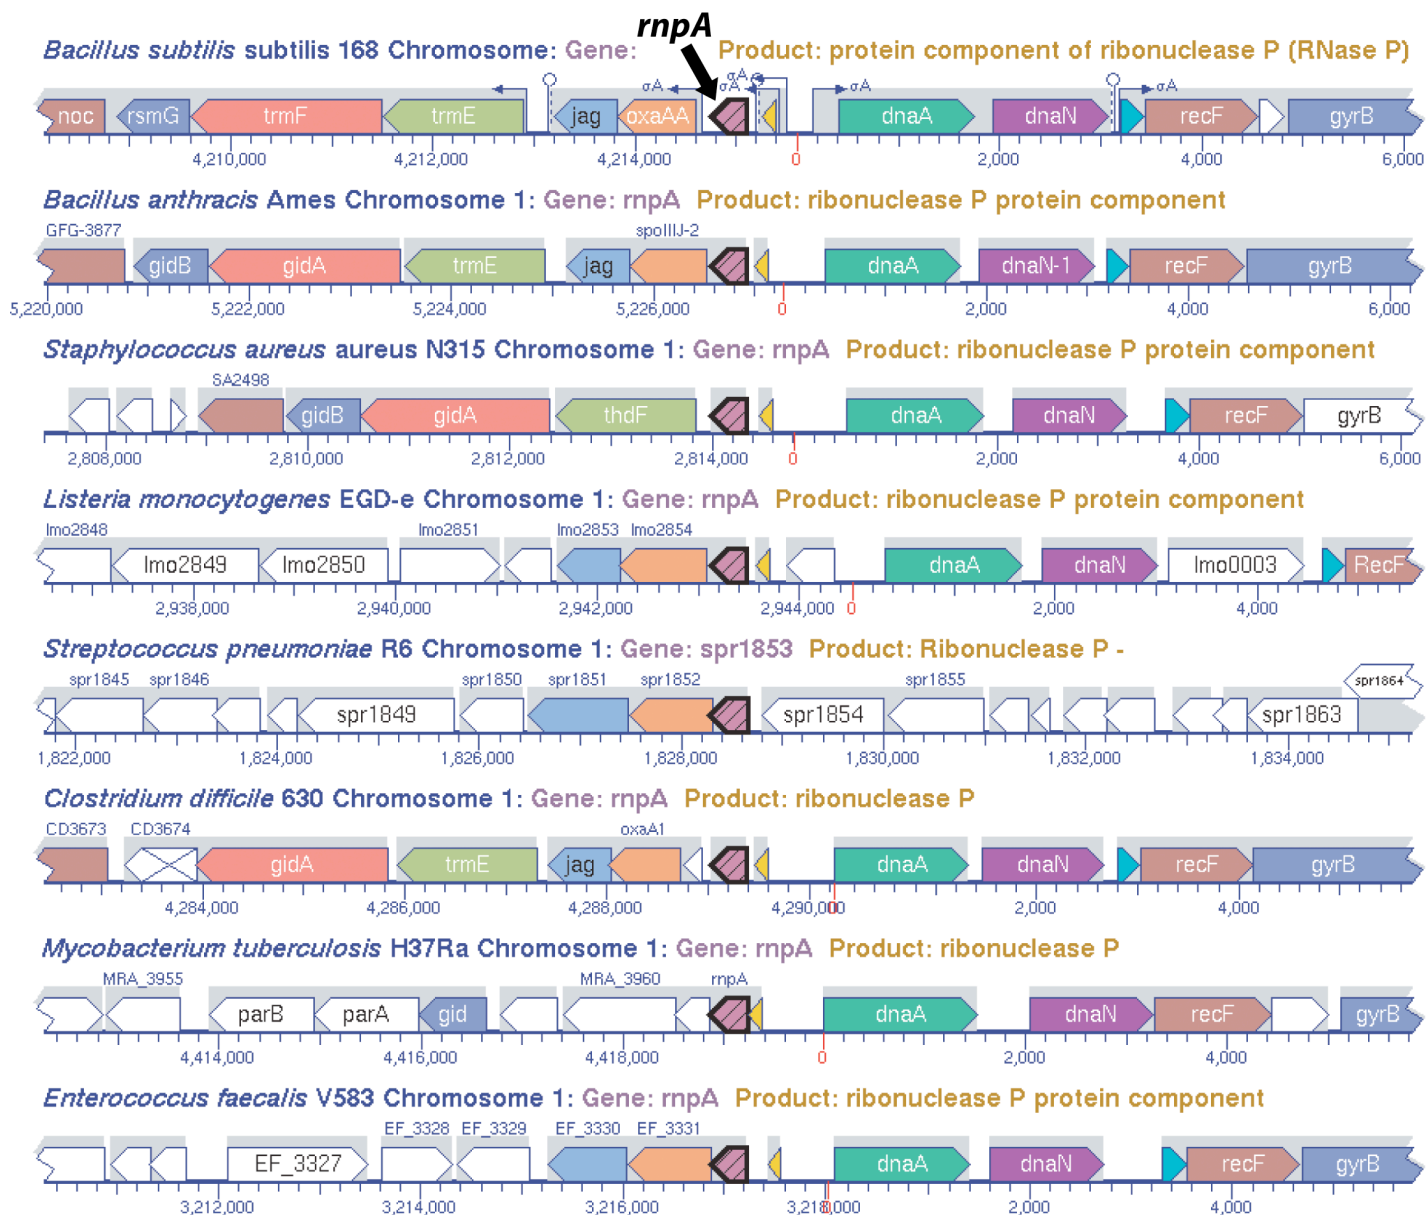

Supplementary Figure 1. Alignment of the genomic context for RNase P (protein subunit) (*rnpA*). Alignment made using [www.Biocyc.org](http://www.Biocyc.org).

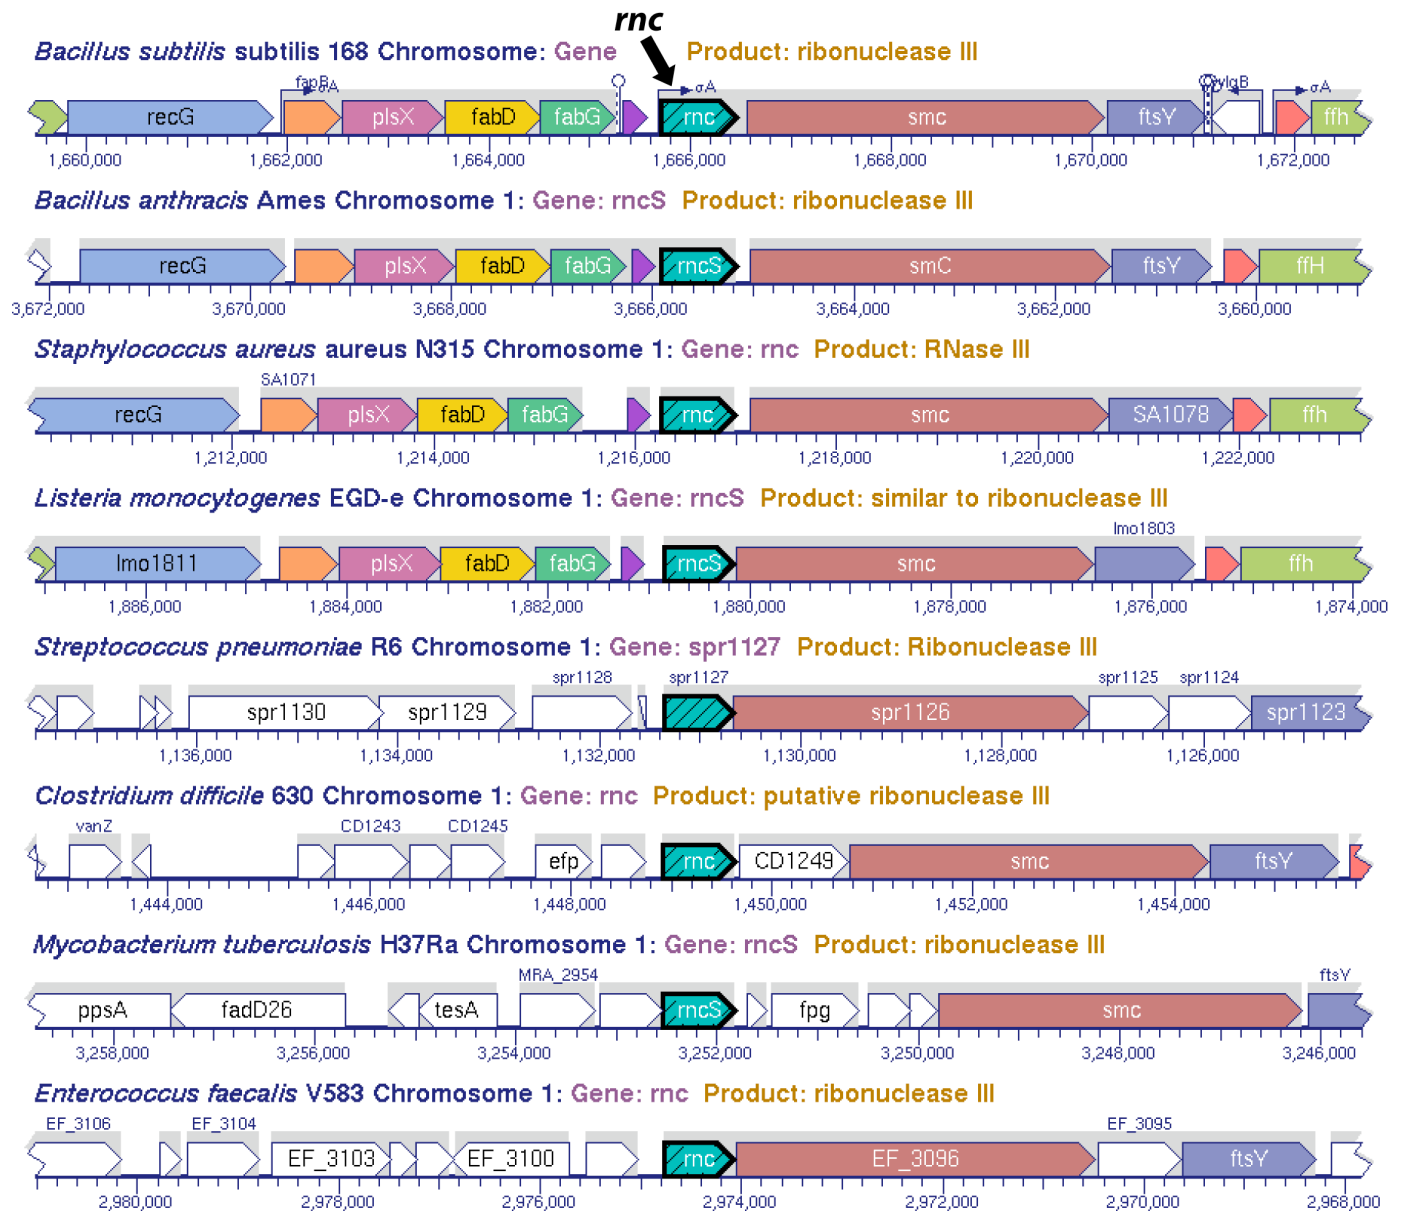

Supplementary Figure 2. Alignment of the genomic context for RNase III (*rnc*). Alignment made using [www.Biocyc.org](http://www.Biocyc.org).

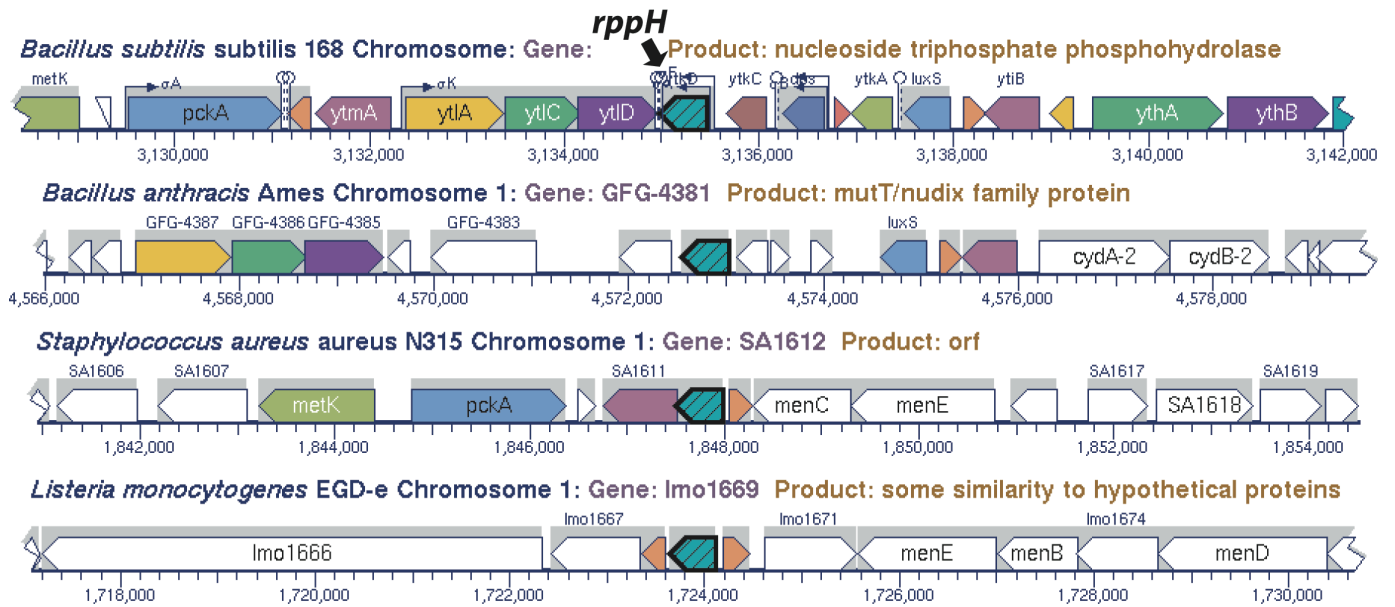

Supplementary Figure 3. Alignment of the genomic context for RppH (*rppH*). Alignment made using [www.Biocyc.org](http://www.Biocyc.org).

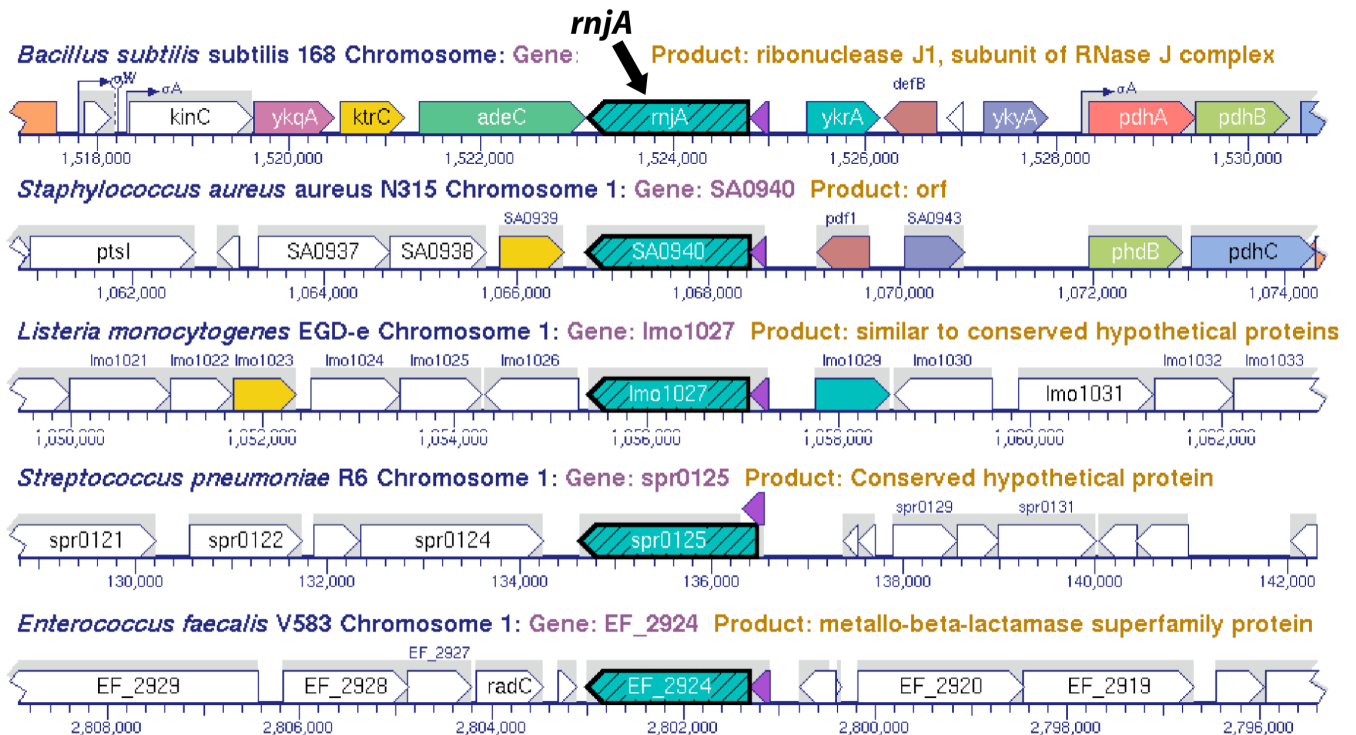

Supplementary Figure 4. Alignment of the genomic context for RNase J1 (*rnjA*). Alignment made using [www.Biocyc.org](http://www.Biocyc.org).

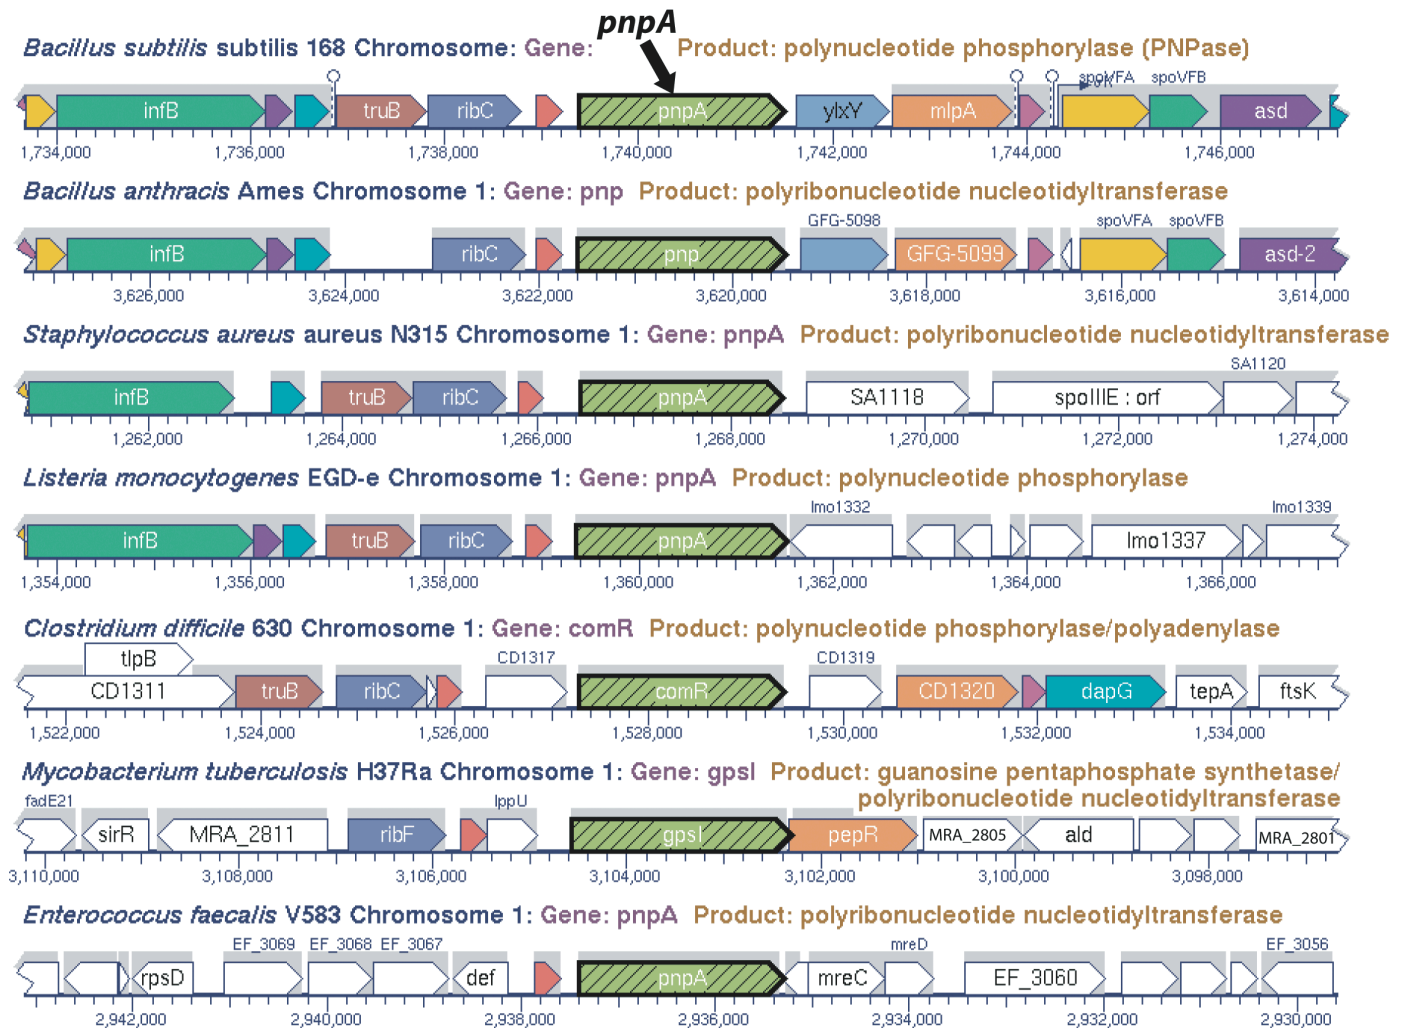

Supplementary Figure 5. Alignment of the genomic context for PNPase (*pnpA*). Alignment made using [www.Biocyc.org](http://www.Biocyc.org).

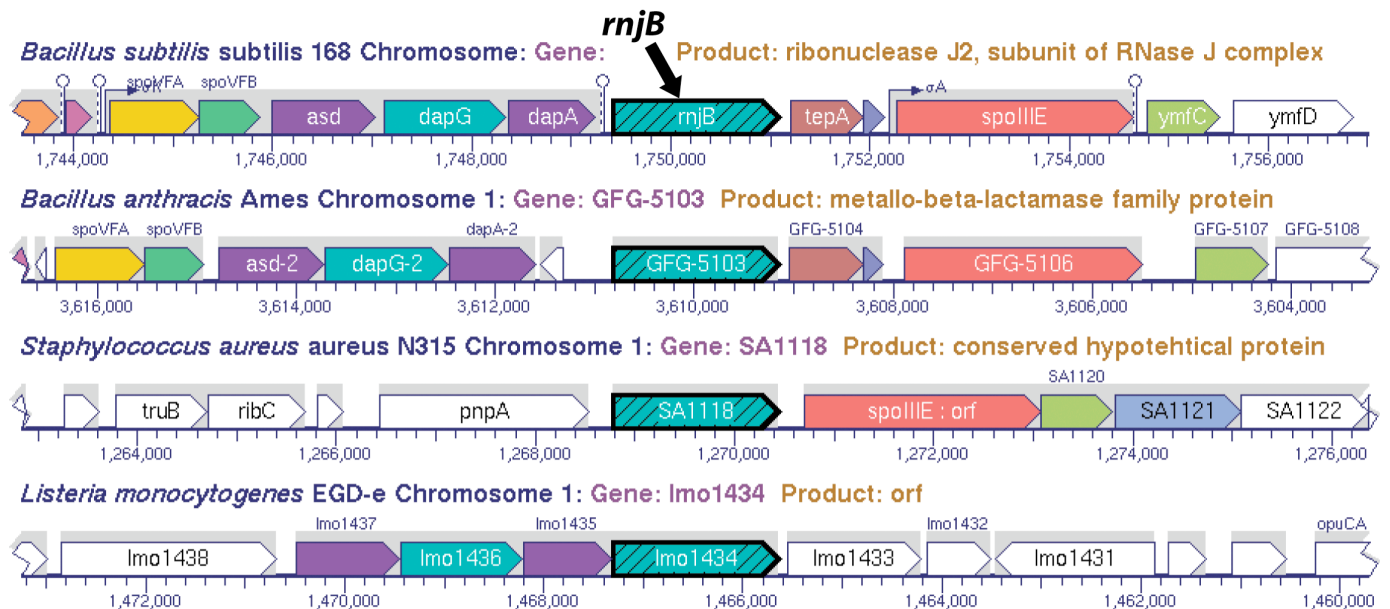

Supplementary Figure 6. Alignment of the genomic context for RNase J2 (*rnjB*). Alignment made using [www.Biocyc.org](http://www.Biocyc.org).

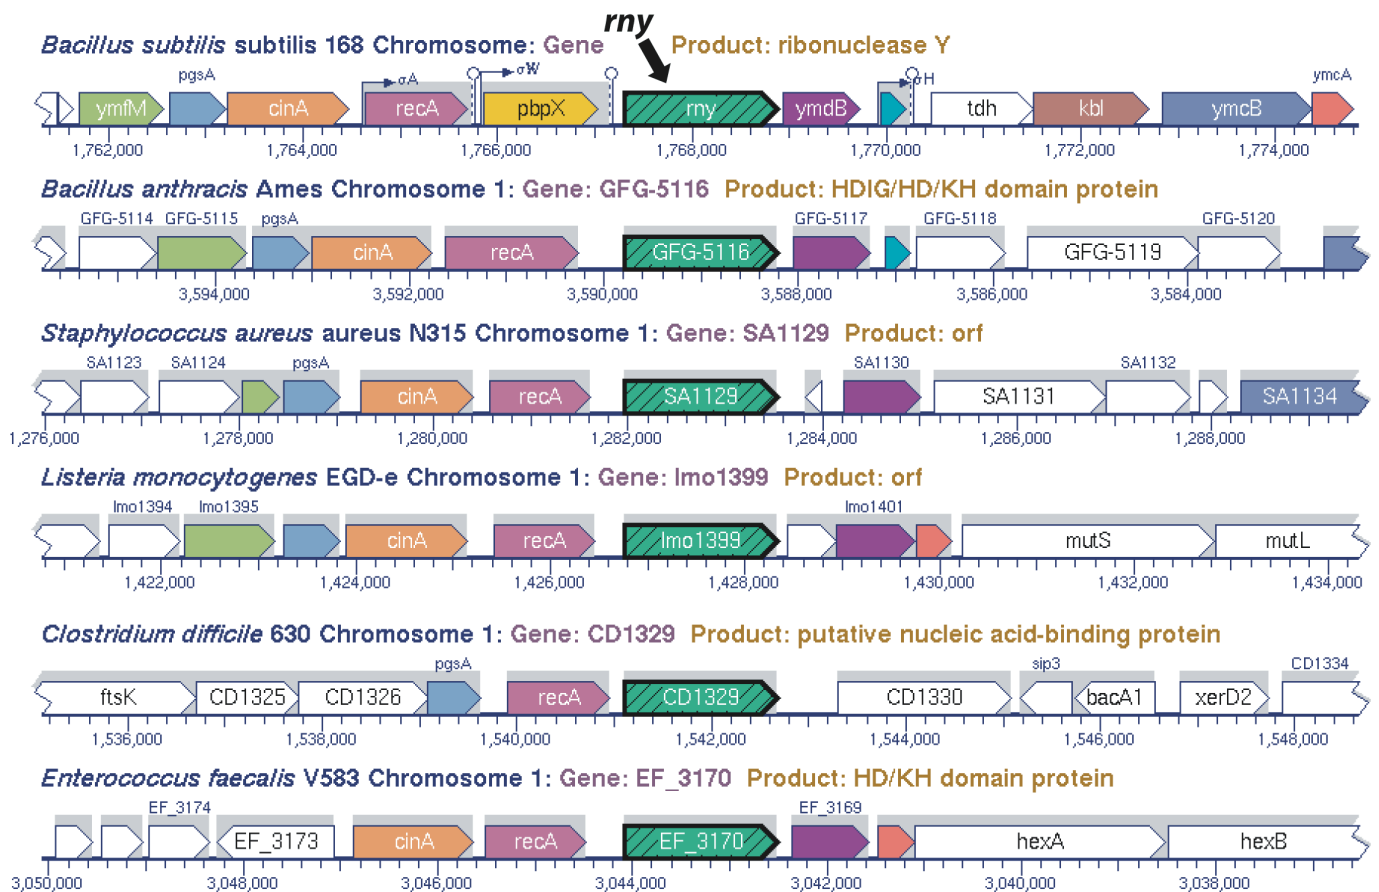

Supplementary Figure 7. Alignment of the genomic context for RNase Y (*rny*, previously *ymdA*). Alignment made using [www.Biocyc.org](http://www.Biocyc.org).

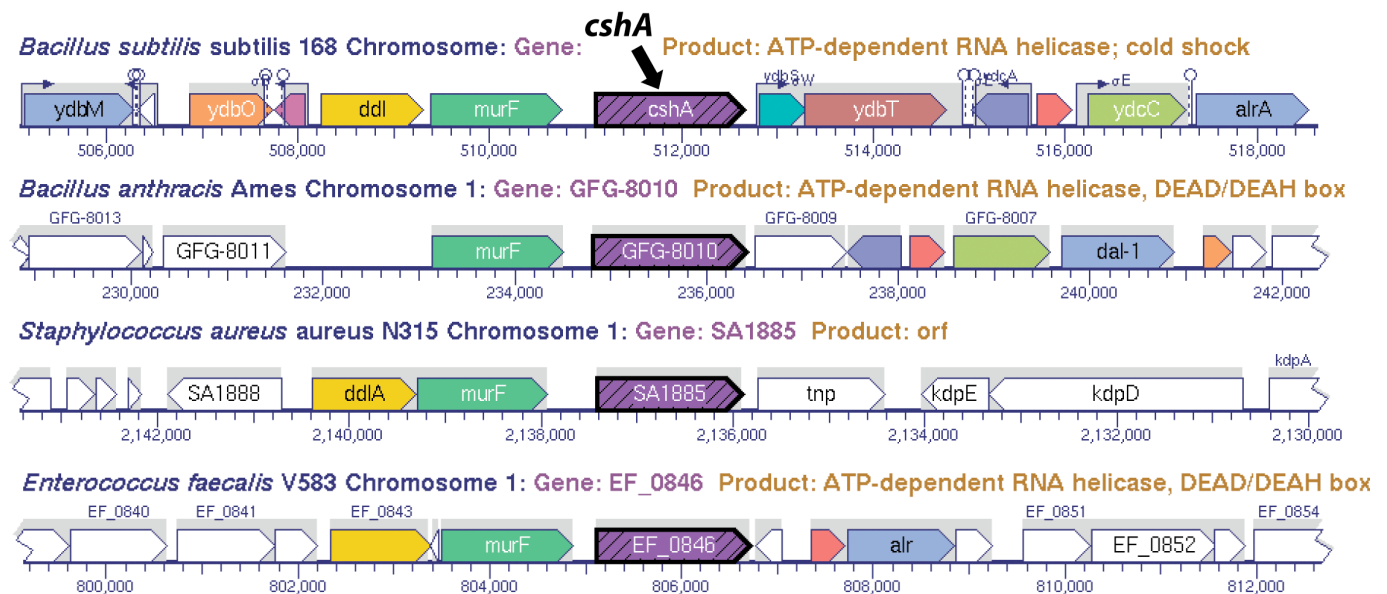

Supplementary Figure 8. Alignment of the genomic context for CshA (*cshA*). Alignment made using [www.Biocyc.org](http://www.Biocyc.org).
